## Matched-paired analysis of patients treated for invasive mucormycosis: standard treatment versus posaconazole new formulations (MoveOn)

Jon Salmanton-García <sup>1</sup>, Danila Seidel<sup>1,2</sup>, Philipp Koehler<sup>1,2</sup>, Sibylle C. Mellinshoff<sup>1</sup>, Raoul Herbrecht<sup>3</sup>, Nikolai Klimko<sup>4</sup>, Zdeněk Ráčil<sup>5,6</sup>, Iker Falces-Romero <sup>7</sup>, Paul Ingram<sup>8,9</sup>, Miguel-Ángel Benítez-Peñuela<sup>10</sup>, José Yesid Rodríguez<sup>10</sup>, Guillaume Desoubeaux<sup>11,12</sup>, Aleksandra Barac<sup>13</sup>, Carolina García-Vidal<sup>14</sup>, Martin Hoenigl<sup>15,16</sup>, Sanjay R. Mehta<sup>15,17</sup>, Matthew P. Cheng <sup>18</sup>, Galina Klyasova<sup>19</sup>, Werner J. Heinz<sup>20</sup>, Nousheen Iqbal<sup>21</sup>, Robert Krause<sup>16</sup>, Helmut Ostermann<sup>22</sup>, Olaf Penack<sup>23</sup>, Enrico Schalk<sup>24</sup>, Donald C. Sheppard<sup>18</sup>, Birgit Willinger<sup>25</sup>, Hilmar Wisplinghoff<sup>26–28</sup>, J. Janne Vehreschild<sup>1,29,30</sup>, Oliver A. Cornely <sup>1,2,29,30–32</sup> and Maria J. G. T. Vehreschild<sup>1,29,30,33\*</sup> on behalf of The FungiScope® ECMM/ISHAM Working Group†

<sup>1</sup>University of Cologne, Faculty of Medicine and University Hospital of Cologne, Department I of Internal Medicine, Center for Integrated Oncology Aachen Bonn Cologne Duesseldorf (CIO ABCD), European Diamond Excellence Center for Medical Mycology (ECMM), Cologne, Germany; <sup>2</sup>Cologne Excellence Cluster on Cellular Stress Responses in Aging-Associated Diseases (CECAD), University of Cologne, Cologne, Germany; <sup>3</sup>Department of Oncology and Hematology, Hôpitaux Universitaires de Strasbourg and Université de Strasbourg, Inserm, UMR-S1113/IRFAC, Strasbourg, France; <sup>4</sup>Department of Clinical Mycology, Allergy and Immunology, North Western State Medical University, Saint Petersburg, Russia; <sup>5</sup>Department of Internal Medicine-Hematology and Oncology, Masaryk University, Brno, Czech Republic; <sup>6</sup>University Hospital Brno, Brno, Czech Republic; <sup>7</sup>Clinical Microbiology and Parasitology Department, University Hospital La Paz, Madrid, Spain; <sup>8</sup>Department of Infectious Diseases, Royal Perth Hospital, Perth, WA, Australia; <sup>9</sup>School of Pathology and Laboratory Medicine, University of Western Australia, Perth, WA, Australia; <sup>10</sup>Center of Microbiological Research of Cesar (CIMCE), Rosario Pumarejo de López Hospital, Laura Daniela Clinic, Médicos Clinic LTDA, Valledupar, Colombia; <sup>11</sup>Parasitology, Mycology and Tropical Medicine Service, University Hospital of Tours, Tours, France; <sup>12</sup>Inserm U1100, Tours University, Tours, France; <sup>13</sup>Clinic for Infectious and Tropical Diseases, Clinical Centre of Serbia, Faculty of Medicine, University of Belgrade, Serbia; <sup>14</sup>Service of Infectious Diseases, Clinic Hospital, University of Barcelona, Institute of Biomedical Research August Pi i Sunyer, Barcelona, Spain; <sup>15</sup>Division of Infectious Diseases, University of California San Diego, San Diego, CA, USA; <sup>16</sup>Section of Infectious Diseases and Tropical Medicine, Department of Internal Medicine, Medical University of Graz, Graz, Austria; <sup>17</sup>Department of Medicine, San Diego Veterans Affairs Medical Center San Diego, CA, USA; <sup>18</sup>Division of Infectious Diseases, Departments of Medicine, Microbiology and Immunology, Research Institute of the McGill University Health Centre, Montreal, QC, Canada; <sup>19</sup>Department of Clinical Microbiology, Mycology and Antibiotic Therapy, National Research Center for Hematology, Moscow, Russia; <sup>20</sup>Department of Internal Medicine II, Julius Maximilians University, Würzburg, Germany; <sup>21</sup>Section of Pulmonology and Critical Care, Department of Medicine, Aga Khan University Hospital, Karachi, Pakistan; <sup>22</sup>Department of Internal Medicine III, University of Munich, Munich, Germany; <sup>23</sup>Department for Hematology, Oncology and Tumorimmunology, Charité University Medicine Berlin, Campus Virchow Clinic, Berlin, Germany; <sup>24</sup>Department of Haematology and Oncology, Medical Centre, Otto-von-Guericke University Magdeburg, Magdeburg, Germany; <sup>25</sup>Division of Clinical Microbiology, Department of Laboratory Medicine, Medical University of Vienna, Vienna, Austria; <sup>26</sup>University of Cologne, Institute for Medical Microbiology, Immunology and Hygiene, Cologne, Germany; <sup>27</sup>Wisplinghoff Laboratories, Cologne, Germany; <sup>28</sup>Institute for Virology and Clinical Microbiology, Witten/Herdecke University, Witten, Germany; <sup>29</sup>German Centre for Infection Research (DZIF), partner site Bonn - Cologne, Cologne, Germany; <sup>30</sup>Center for Integrated Oncology CIO Köln/Bonn, Medical Faculty, University of Cologne, Cologne, Germany; <sup>31</sup>Clinical Trials Centre Cologne (ZKS Köln), University of Cologne, Cologne, Germany; <sup>32</sup>Center for Molecular Medicine Cologne (CMMC), University of Cologne, Cologne, Germany; <sup>33</sup>Department of Internal Medicine, Infectious Diseases, Goethe University, Frankfurt, Frankfurt am Main, Germany

\*Corresponding author. Tel: +49 (0) 221 478 88794; Fax: +49 (0) 221 478 1422962; E-mail: Maria.Vehreschild@uk-koeln.de  
†Members are listed in the Acknowledgements section.

Received 8 May 2019; returned 4 June 2019; revised 4 July 2019; accepted 9 July 2019

**Background:** First-line antifungal treatment for invasive mucormycosis (IM) consists of liposomal amphotericin B. Salvage treatment options are limited and often based on posaconazole oral suspension. With the approval of posaconazole new formulations, patients could benefit from improved pharmacokinetics, safety and tolerability.

**Objectives:** Our aim was to assess the effectiveness of posaconazole new formulations for IM treatment.

**Methods:** We performed a case-matched analysis with proven or probable IM patients from the FungiScope® Registry. First-line posaconazole new formulations (1st-POSnew) and first-line amphotericin B plus posaconazole new formulations (1st-AMB+POSnew) cases were matched with first-line amphotericin B-based (1st-AMB) treatment controls. Salvage posaconazole new formulations (SAL-POSnew) cases were matched with salvage posaconazole oral suspension (SAL-POSSusp) controls. Each case was matched with up to three controls (based on severity, haematological/oncological malignancy, surgery and/or renal dysfunction).

**Results:** Five patients receiving 1st-POSnew, 18 receiving 1st-AMB+POSnew and 22 receiving SAL-POSnew were identified. By day 42, a favourable response was reported for 80.0% ( $n=4/5$ ) of patients receiving 1st-POSnew, for 27.8% ( $n=5/18$ ) receiving 1st-AMB+POSnew and for 50.0% ( $n=11/22$ ) receiving SAL-POSnew. Day 42 all-cause mortality of patients receiving posaconazole new formulations was lower compared with controls [20.0% ( $n=1/5$ ) in 1st-POSnew versus 53.3% ( $n=8/15$ ) in 1st-AMB; 33.3% ( $n=6/18$ ) in 1st-AMB+POSnew versus 52.0% ( $n=26/50$ ) in 1st-AMB; and 0.0% ( $n=0/22$ ) in SAL-POSnew versus 4.4% ( $n=2/45$ ) in SAL-POSSusp].

**Conclusions:** Posaconazole new formulations were effective in terms of treatment response and associated mortality of IM. While posaconazole new formulations may be an alternative for treatment of IM, the limited sample size of our study calls for a cautious interpretation of these observations.

## Introduction

Invasive mucormycosis (IM) is an emerging invasive fungal disease (IFD) with a considerable incidence in patients with haematological/oncological malignancies.<sup>1,2</sup> Compared with *Aspergillus* spp., however, Mucorales remain an unusual cause of IFD, being the causative pathogen of 8% of IFD in high-risk haematological/oncological patients, with a cumulative incidence of 0.29%.<sup>3,4</sup> Antifungal treatment, surgical debridement and correction of predisposing underlying conditions are crucial in the treatment of IM.<sup>5,6</sup> Despite this multimodal approach, reported mortality rates reach 91%.<sup>1,2,7</sup> We hypothesized that the optimal use of the available antifungal armamentarium may reduce mortality and improve patient outcome.

European medical guidelines advocate amphotericin B (AMB)-based drugs as first-line treatment.<sup>5</sup> However, their utilization is restricted by significant nephrotoxicity, even when liposomal formulations are employed.<sup>8–12</sup> Along with the most recent triazole, isavuconazole, posaconazole is another antifungal with *in vitro* activity against Mucorales.<sup>13,14</sup> To date, use of posaconazole for treating IM has been mainly restricted to salvage treatment,<sup>10,15–17</sup> although there are case reports of patients treated with posaconazole new formulations (POSnew) as first-line treatment.<sup>18</sup> The availability of posaconazole new formulations as delayed-release tablets and intravenous infusion may enable improved treatment of IM, as these two formulations facilitate increased and stable plasma concentrations.<sup>19</sup> Previous studies demonstrated the benefits of posaconazole new formulations concerning pharmacokinetics, safety and tolerability.<sup>20–24</sup>

Here, we present the results of a retrospective matched-paired analysis of patients treated for IM, comparing standard treatments with posaconazole new formulations.

## Patients and methods

### Setting

Proven and probable cases of IM were identified from FungiScope®<sup>25,26</sup> (www.ClinicalTrials.gov, NCT 01731353), according to the European

Organization for Research and Treatment of Cancer/Mycoses Study Group (EORTC/MSG) criteria (Figure 1).<sup>27</sup> FungiScope® (www.fungiscope.net) is a worldwide university-based registry aiming to improve knowledge on different aspects of emerging IFD, including clinical manifestations, epidemiology and antifungal treatment. Data are collected via a web-based questionnaire hosted at www.clinicalsurveys.net, and, after documentation, an infectious diseases specialist validates each case with regard to coherence and completeness. Ethics approval from the University of Cologne, Germany was obtained for FungiScope® (Study ID: 05-102).

### Definitions

#### Primary treatment

Primary treatment was defined as treatment of patients with an acute IM [onset <14 days before first administration of posaconazole new formulations (1st-POSnew) or amphotericin B (1st-AMB) for at least four consecutive days]. Patients receiving another treatment active against Mucorales (i.e. isavuconazole or itraconazole)<sup>28,29</sup> for >4 days within 7 days prior to the first posaconazole new formulations or amphotericin B administration were excluded.

Together with the previous criteria, any patient who received >3 days of treatment with posaconazole new formulations combined with amphotericin B (1st-AMB+POSnew) was compared with a patient treated with 1st-AMB alone, in an independent analysis.

#### Salvage treatment

Salvage treatment was defined as treatment of patients refractory or intolerant to the initial treatment, based on the opinion of the treating physician entering the data. Initial treatment included treatment with antifungals active against Mucorales other than posaconazole administered for at least 7 days with an onset <14 days after IM diagnosis. Patients receiving salvage treatment with posaconazole new formulations (SAL-POSnew) were compared with patients treated with standard posaconazole oral suspension (SAL-POSSusp).

#### Day zero

Day zero was defined as the day when the patient was initiated in the respective treatment group active against IM (1st-AMB, 1st-POSnew, 1st-AMB+POSnew, SAL-POSnew or SAL-POSSusp).

## Response to treatment

Response to antifungal treatment was determined according to pre-established criteria,<sup>30,31</sup> with four categories: complete response and partial response, grouped into 'favourable response'; and stable disease and progression, grouped into 'unfavourable response' (Table S1, available as [Supplementary data](#) at JAC Online).

## Case matching procedure

Severe disease, defined as CNS involvement and/or disseminated disease<sup>2,9</sup> (involvement of two or more non-contiguous organs or pathogen isolation from blood), presence of an underlying haematological/oncological condition and renal dysfunction, defined as a glomerular filtration rate (GFR) <90 mL/min at antifungal treatment initiation,<sup>5,16</sup> were considered underlying conditions for an unfavourable response to treatment of IM.<sup>2,7,8,15</sup> Surgery, defined as resection or debridement of the infected site within 14 days prior to or after diagnosis of IM, has been shown to reduce mortality.<sup>1,2,5,13</sup> Based on these considerations, matching factors in first-line treatment analyses included: (i) severe disease; (ii) surgery; (iii) renal dysfunction; and (iv) haematological/oncological malignancy. In the salvage treatment analysis, renal dysfunction was excluded as a matching factor.

Case-control matching was performed using the computing environment R (R Development Core Team, version 3.4.3, Vienna, Austria). A control patient could be matched only once. Patients in the 1st-POSnew and the 1st-AMB+POSnew groups were matched with up to three controls receiving 1st-AMB separately. This matching procedure was also performed in SAL-POSnew patients, who were matched with up to three controls receiving SAL-POSsusp. When a matching in all the variables was not possible, surgery was ignored.

## Statistical analysis

SPSS software was used for the statistical analyses (SPSS, version 25.0, Chicago, IL, USA). Data were summarized employing frequencies and percentages, and median and IQR as appropriate. Categorical data were compared using  $\chi^2$  or Fisher's exact test when a cell value was <5. A *P* value  $\leq 0.05$  was considered statistically significant.

For all-cause mortality endpoints, cumulative and weighted mortality rates were calculated, weights being applied depending on the ratio of controls matched per case. Survival probability was tested using Kaplan-Meier survival plots for each group comparison for day 84 after treatment initiation. Log-rank tests were performed to determine statistically significant differences between groups' survival lines.

## Results

In November 2018, a total of 874 cases were extracted from FungiScope<sup>®</sup> to retrospectively assess the effectiveness of posaconazole new formulations as first-line and salvage treatments in IM. Of these, 439 patients were excluded since their diagnosis was other than IM, 205 additional cases did not meet the inclusion criteria (due to possible mucormycosis, proven or probable mucormycosis diagnosed by PCR, no treatment administration or administration of a different antifungal regimen from that required) and 84 patients remained unmatched (all with standard treatment regimens). Eventually, 79 patients were selected for first-line treatment analyses (5 1st-POSnew cases matched to 15 1st-AMB controls and 18 1st-AMB+POSnew cases matched to 50 1st-AMB controls) and 67 for salvage treatment analysis (22 SAL-POSnew cases matched to 45 SAL-POSsusp controls) (Figure 1, Tables S2, S3 and S4).

Overall, five adult cases receiving 1st-POSnew were matched with 15 adult controls receiving 1st-AMB (Figure 1, Table S2), diagnosed between 2015 and 2016. These controls were diagnosed between 2000 and 2017 and included three (20.0%) children/adolescents and 12 (80.0%) adults (Table 1).

*Lichtheimia* spp. was reported as the causative pathogen in two (40.0%) 1st-POSnew patients. Additionally, *Rhizomucor* spp. and *Aspergillus* spp. coinfection was described in one (20.0%) patient. The most prevalent pathogens in patients receiving 1st-AMB were *Mucor* spp. in five (33.3%) patients, *Rhizopus* spp. in four (26.7%) patients and *Lichtheimia* spp. in three (20.0%) patients (Table 1, Tables S5 and S6).

Prevalent haematological/oncological malignancy and corticosteroids/immunosuppressive administration, with four (80.0%) patients each, were the most prevalent underlying conditions in the 1st-POSnew group. Obesity and neutropenia with two (40.0%) patients each were also relevant underlying conditions. A similar distribution was observed in the 1st-AMB group, with 12 (80.0%) patients having a diagnosis of haematological/oncological malignancy. Neutropenia was present in nine (60.0%) patients, and corticosteroids/immunosuppressive administration in eight (53.3%) patients in the 1st-AMB controls.

The lung was the most frequently affected organ in the 1st-POSnew group concerning three (60.0%) patients. Two (40.0%) patients had non-lung infection, one of which presented with coinfection of the paranasal sinus(es), deep soft tissue, skin and eye(s), and the other with localized deep soft tissue infection. No patient had disseminated IM. In the 1st-AMB group, the majority of the patients had localized infection, with IM affecting the bowel, lung ( $n=4$ ; 26.7% each), deep soft tissue ( $n=3$ ; 20.0%) or paranasal sinuses ( $n=1$ ; 6.7%). Additionally, three (20.0%) patients had two organs affected simultaneously, specifically lung and paranasal sinuses, skin and paranasal sinuses, and skin and deep soft tissues (Table 1, Tables S6 and S7).

Treatment duration was similar between the 1st-POSnew cases and 1st-AMB controls [median of 26.0 (IQR 9.0–55.0) days versus median of 30.0 (IQR 10.0–45.0) days, respectively]. 1st-POSnew patients [median of 81.0 (IQR 68.0–184.0) days] were observed for longer than 1st-AMB controls [median of 33.0 (IQR 10.0–45.0) days]. No drug-related adverse effects ascribed to antifungal treatment were reported in 1st-POSnew patients, whereas one (6.7%) patient in the 1st-AMB group experienced renal dysfunction (Table 2, Table S8).

A day 42 favourable response was observed in four (80.0%) 1st-POSnew patients, compared with three (20.0%) 1st-AMB controls (Table 3, Table S9). By day 42, one (20.0%) 1st-POSnew patient had died compared with eight (53.3%) in the 1st-AMB group. Weighted mortality did not differ from crude mortality (Table 4). On day 84 after treatment start, in Kaplan-Meier survival curves, 1st-POSnew patients exhibited a higher survival probability (80.0%) than did 1st-AMB patients (33.8%), although this did not reach statistical significance ( $P=0.117$ ) (Figure 2a).

In the 18 1st-AMB+POSnew patients, IM was diagnosed between 2010 and 2018. They were matched with 50 patients receiving 1st-AMB and who were diagnosed between 1997 and 2018 (Figure 1, Table S3). The 1st-AMB+POSnew group consisted of two (8.0%) children/adolescents and 16 (92.0%) adults, whereas the 1st-AMB control group included six (11.0%) children/adolescents and 44 (89.0%) adults (Table 1).

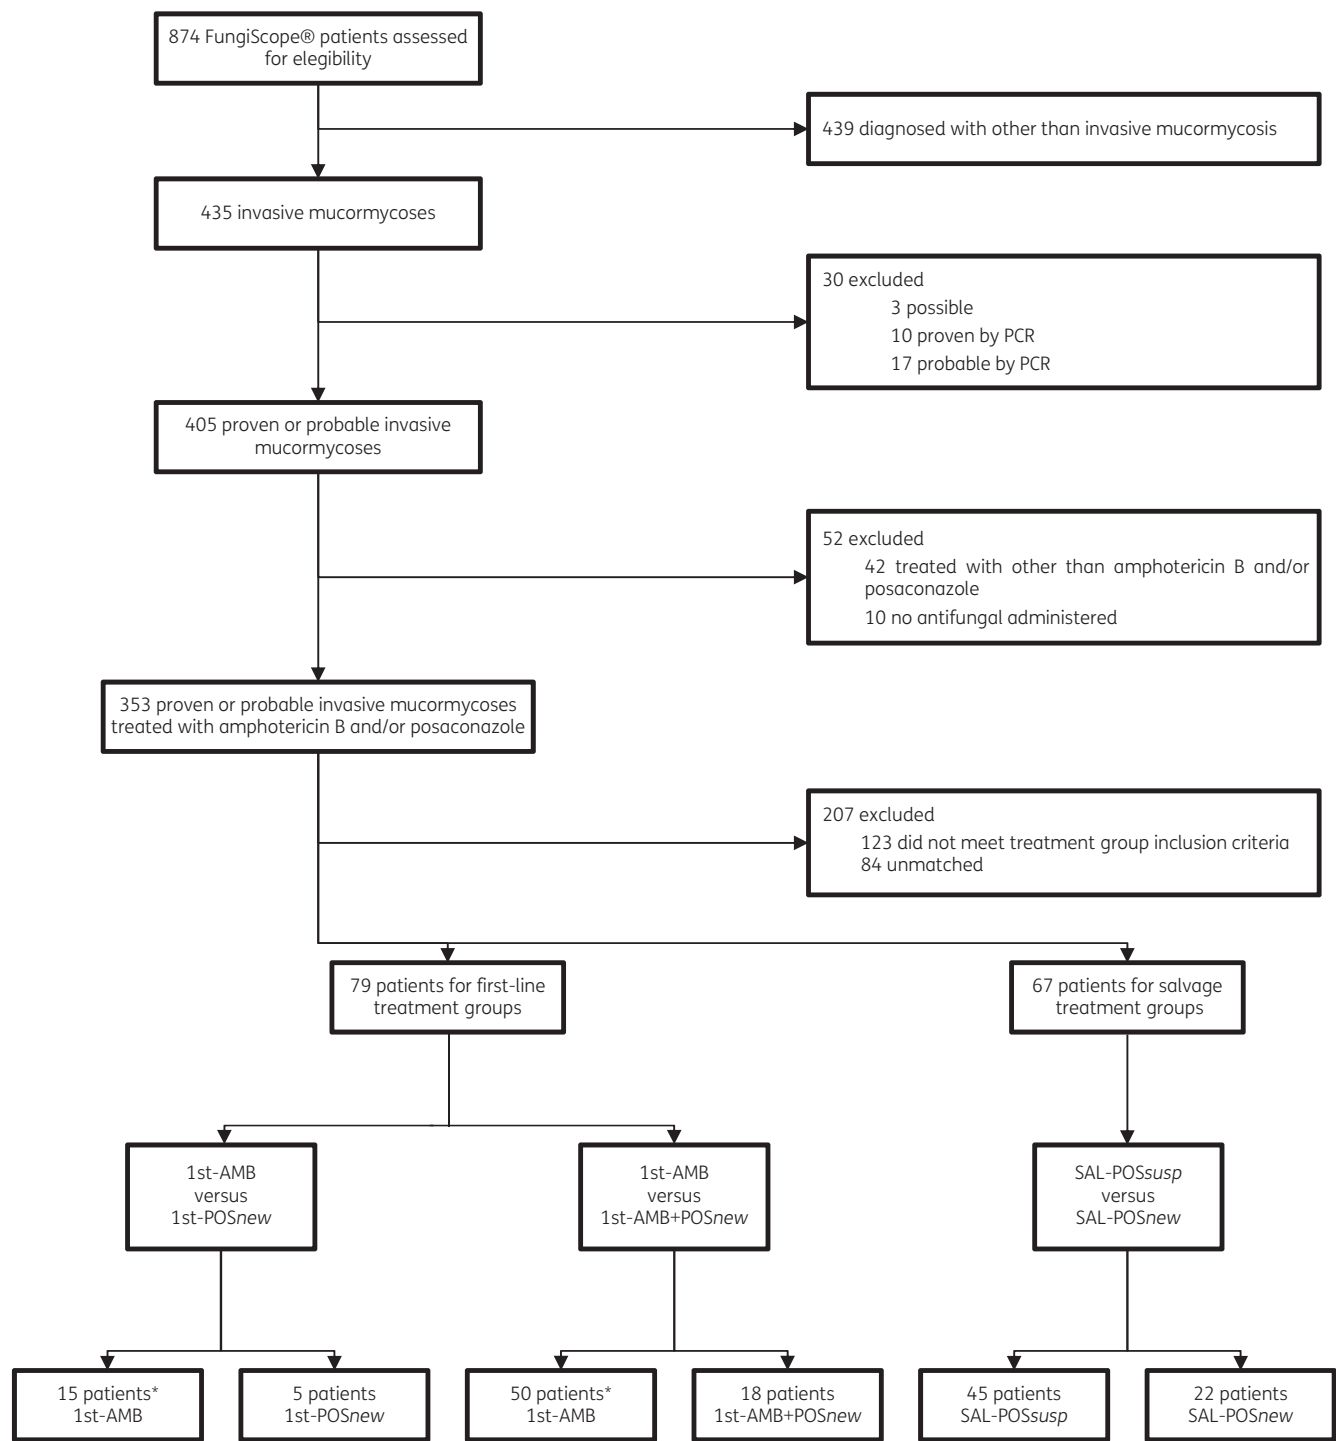

**Figure 1.** MoveOn enrolment and study flow chart. The asterisks indicate that nine patients treated with 1st-AMB were employed as matched pairs for both 1st-POSnew and 1st-AMB+POSnew cases.

*Rhizopus* spp. were reported as the causative pathogen in 10 (55.6%) patients receiving 1st-AMB+POSnew, followed by the pathogens *Apophysomyces* spp. in three (16.7%) cases and Mucorales-not otherwise specified (NOS) in two (11.1%) cases. In 1st-AMB patients, the most prevalent causative pathogens were *Mucor* spp. and *Rhizopus* spp., with 15 (30.0%) cases

each, followed by *Lichtheimia* spp. in five (10.0%) cases and *Rhizomucor* spp. in four (8.0%). Two (11.1%) 1st-AMB+POSnew cases had a coinfection (both with *Candida* spp.), as did seven (14.0%) 1st-AMB controls (*Aspergillus* spp., *Candida* spp. and/or *Scedosporium/Lomentospora* spp.) (Table 1, Tables S5 and S6).

**Table 1.** Patient characteristics by group

|                                       | 1st-AMB<br>(n=15) | 1st-POSnew<br>(n=5) | 1st-AMB<br>(n=50) | 1st-AMB+POSnew<br>(n=18) | SAL-POSsusp<br>(n=45) | SAL-POSnew<br>(n=22) |
|---------------------------------------|-------------------|---------------------|-------------------|--------------------------|-----------------------|----------------------|
| Year of infection                     | 2000–17           | 2015–16             | 1997–2018         | 2010–18                  | 2000–18               | 2008–17              |
| Age at diagnosis                      |                   |                     |                   |                          |                       |                      |
| child/adolescent                      | 3 (20.0)          | –                   | 6 (11.0)          | 2 (8.0)                  | 4 (8.8)               | 1 (4.5)              |
| 0–6 years                             | –                 | –                   | 2 (4.0)           | 1 (5.6)                  | 2 (4.4)               | –                    |
| 7–11 years                            | 1 (6.7)           | –                   | 2 (4.0)           | –                        | 1 (2.2)               | –                    |
| 12–16 years                           | 2 (13.3)          | –                   | 2 (4.0)           | 1 (5.6)                  | 1 (2.2)               | 1 (4.5)              |
| adult                                 | 12 (80.1)         | 5 (100.0)           | 44 (89.0)         | 16 (92.0)                | 41 (91.1)             | 21 (95.4)            |
| 17–29 years                           | 1 (6.7)           | 2 (40.0)            | 7 (14.0)          | 1 (5.6)                  | 4 (8.9)               | 2 (9.1)              |
| 30–49 years                           | 3 (20.0)          | 3 (60.0)            | 11 (22.0)         | 7 (38.9)                 | 8 (17.8)              | 1 (4.5)              |
| 50–69 years                           | 7 (46.7)          | –                   | 19 (38.0)         | 6 (33.3)                 | 24 (53.3)             | 15 (68.2)            |
| ≥70 years                             | 1 (6.7)           | –                   | 7 (14.0)          | 2 (11.1)                 | 5 (11.1)              | 3 (13.6)             |
| Female (%)                            | 5 (33.3)          | 1 (20.0)            | 18 (36.0)         | 7 (38.9)                 | 18 (40.0)             | 8 (36.4)             |
| Causative pathogen                    |                   |                     |                   |                          |                       |                      |
| <i>Apophysomyces</i> spp.             | –                 | –                   | 2 (4.0)           | 3 (16.7)                 | –                     | –                    |
| <i>Cunninghamella</i> spp.            | 1 (6.7)           | –                   | 3 (6.0)           | 1 (5.6)                  | 1 (2.2)               | –                    |
| <i>Lichtheimia</i> spp.               | 3 (20.0)          | 2 (40.0)            | 6 (11.0)          | –                        | 8 (17.8)              | 4 (18.2)             |
| <i>Mucor</i> spp.                     | 5 (33.3)          | –                   | 15 (30.0)         | 1 (5.6)                  | 12 (26.7)             | 5 (22.7)             |
| <i>Rhizomucor</i> spp.                | –                 | 1 (20.0)            | 4 (8.0)           | 1 (5.6)                  | 1 (2.2)               | 2 (9.1)              |
| <i>Rhizopus</i> spp.                  | 4 (26.7)          | 1 (20.0)            | 15 (30.0)         | 11 (61.1)                | 12 (26.7)             | 9 (40.5)             |
| <i>Saksenaea</i> spp.                 | –                 | –                   | 2 (4.0)           | –                        | –                     | 1 (4.5)              |
| Mucorales-NOS <sup>a</sup>            | 2 (13.3)          | 1 (20.0)            | 3 (6.0)           | 2 (11.1)                 | 11 (24.4)             | 1 (4.5)              |
| Underlying conditions                 |                   |                     |                   |                          |                       |                      |
| haematological/oncological malignancy | 12 (80.0)         | 4 (80.0)            | 29 (58.0)         | 11 (61.1)                | 30 (66.7)             | 10 (45.5)            |
| type of malignancy                    |                   |                     |                   |                          |                       |                      |
| acute leukaemia                       | 8 (53.3)          | 4 (80.0)            | 17 (34.0)         | 6 (33.3)                 | 17 (37.8)             | 6 (27.3)             |
| aplastic anaemia                      | –                 | –                   | 1 (2.0)           | 1 (5.6)                  | 1 (2.2)               | –                    |
| chronic leukaemia                     | –                 | –                   | 5 (10.0)          | –                        | 5 (11.1)              | 1 (4.5)              |
| lymphoma                              | 3 (20.0)          | –                   | 3 (6.0)           | 1 (5.6)                  | 5 (11.1)              | 1 (4.5)              |
| multiple myeloma                      | 1 (6.7)           | –                   | 1 (2.0)           | –                        | –                     | –                    |
| myelodysplastic syndrome              | –                 | –                   | –                 | 2 (11.1)                 | 2 (4.4)               | 3 (13.6)             |
| solid tumour <sup>b</sup>             | –                 | –                   | 2 (4.0)           | 1 (5.6)                  | 2 (4.4)               | 2 (9.1)              |
| other <sup>c</sup>                    | –                 | –                   | –                 | –                        | 1 (2.2)               | –                    |
| treatment for malignancy              |                   |                     |                   |                          |                       |                      |
| chemotherapy                          | 12 (80.0)         | 4 (80.0)            | 28 (56.0)         | 11 (61.1)                | 25 (55.6)             | 7 (31.8)             |
| allogeneic-HSCT                       | 4 (26.7)          | 2 (40.0)            | 11 (22.0)         | 4 (22.2)                 | 6 (13.3)              | 5 (22.7)             |
| autologous-HSCT                       | 1 (6.7)           | –                   | –                 | –                        | 1 (2.2)               | 1 (4.5)              |
| corticosteroids/immunosuppressives    | 8 (53.3)          | 4 (80.0)            | 29 (58.0)         | 9 (50.0)                 | 18 (40.0)             | 13 (59.1)            |
| neutropenia                           | 9 (60.0)          | 2 (40.0)            | 20 (40.0)         | 7 (38.9)                 | 15 (33.3)             | 7 (31.8)             |
| alcoholism                            | –                 | –                   | 2 (4.0)           | –                        | 1 (2.2)               | 1 (4.5)              |
| burn                                  | –                 | –                   | –                 | 1 (5.6)                  | –                     | –                    |
| chronic cardiovascular disease        | 2 (13.3)          | –                   | 3 (6.0)           | 1 (5.6)                  | –                     | –                    |
| chronic liver disease                 | –                 | –                   | –                 | –                        | 1 (2.2)               | 1 (4.5)              |
| chronic lung disease                  | 3 (20.0)          | –                   | 3 (6.0)           | –                        | 2 (4.4)               | 3 (13.6)             |
| chronic renal disease                 | –                 | –                   | 4 (8.0)           | 1 (5.6)                  | 1 (2.2)               | 1 (4.5)              |
| diabetes mellitus                     | 2 (13.3)          | 1 (20.0)            | 13 (26.0)         | 1 (5.6)                  | 9 (20.0)              | 6 (27.3)             |
| GvHD <sup>d</sup>                     | 1 (6.7)           | 1 (20.0)            | 5 (10.0)          | 2 (11.1)                 | 3 (6.7)               | 3 (13.6)             |
| major surgery <sup>e</sup>            | –                 | –                   | –                 | 2 (11.1)                 | 1 (2.2)               | 3 (13.6)             |
| rheumatic/autoimmune disease          | –                 | –                   | 1 (2.0)           | 1 (5.6)                  | –                     | 5 (22.7)             |
| obesity or underweight                | 2 (13.3)          | 2 (40.0)            | 5 (10.0)          | 3 (16.7)                 | 8 (17.8)              | 3 (13.6)             |
| solid organ transplantation           | –                 | –                   | 2 (4.0)           | 1 (5.6)                  | 1 (2.2)               | 1 (4.5)              |
| trauma                                | 1 (6.7)           | –                   | 4 (8.0)           | 4 (22.2)                 | 3 (6.7)               | 2 (9.1)              |
| treatment in ICU                      | 1 (6.7)           | 1 (20.0)            | 9 (18.0)          | 5 (27.8)                 | 4 (8.9)               | 2 (9.1)              |

Continued



**Table 1.** Continued

|                                          | 1st-AMB<br>(n=15) | 1st-POS <sup>new</sup><br>(n=5) | 1st-AMB<br>(n=50) | 1st-AMB+POS <sup>new</sup><br>(n=18) | SAL-POS <sup>susp</sup><br>(n=45) | SAL-POS <sup>new</sup><br>(n=22) |
|------------------------------------------|-------------------|---------------------------------|-------------------|--------------------------------------|-----------------------------------|----------------------------------|
| viral pneumonia <sup>f</sup>             | 1 (6.7)           | –                               | –                 | –                                    | –                                 | 2 (9.1)                          |
| other underlying conditions <sup>g</sup> | 1 (6.7)           | –                               | 3 (6.0)           | –                                    | 1 (2.2)                           | 3 (13.6)                         |
| no risk factor identified                | 1 (6.7)           | 1 (20.0)                        | 3 (6.0)           | –                                    | –                                 | 1 (4.5)                          |
| Disease location                         |                   |                                 |                   |                                      |                                   |                                  |
| lung only                                | 4 (26.7)          | 3 (60.0)                        | 11 (22.0)         | 3 (16.7)                             | 17 (37.8)                         | 6 (27.3)                         |
| lung and other organs                    | 1 (6.7)           | –                               | 10 (20.0)         | 3 (16.7)                             | 6 (13.3)                          | 3 (13.6)                         |
| non-lung disease                         | 10 (66.7)         | 2 (40.0)                        | 29 (58.0)         | 12 (66.7)                            | 22 (48.9)                         | 13 (59.1)                        |
| Non-lung disease location                |                   |                                 |                   |                                      |                                   |                                  |
| paranasal sinus(es)                      | 3 (20.0)          | 1 (20.0)                        | 16 (32.0)         | 5 (27.8)                             | 14 (31.1)                         | 5 (22.7)                         |
| deep soft tissues                        | 4 (26.7)          | 2 (40.0)                        | 17 (34.0)         | 9 (50.0)                             | 9 (20.0)                          | 5 (22.7)                         |
| CNS                                      | –                 | –                               | 9 (18.0)          | 2 (11.1)                             | 7 (15.6)                          | 3 (13.6)                         |
| blood                                    | –                 | –                               | 3 (6.0)           | –                                    | –                                 | 1 (4.5)                          |
| bowel                                    | 4 (26.7)          | –                               | 6 (12.0)          | –                                    | 5 (11.1)                          | 2 (9.1)                          |
| kidneys                                  | –                 | –                               | 3 (6.0)           | –                                    | 1 (2.2)                           | 1 (4.5)                          |
| peritoneum                               | –                 | –                               | 2 (4.0)           | 1 (5.6)                              | –                                 | 2 (9.1)                          |
| skin                                     | 2 (13.3)          | 1 (20.0)                        | 4 (8.0)           | –                                    | 2 (4.4)                           | 1 (4.5)                          |
| spleen                                   | –                 | –                               | 2 (4.0)           | 1 (5.6)                              | 1 (2.2)                           | 1 (4.5)                          |
| vessels                                  | –                 | –                               | 2 (4.0)           | –                                    | –                                 | –                                |
| bone                                     | –                 | –                               | 2 (4.0)           | 1 (5.6)                              | 8 (17.8)                          | 1 (4.5)                          |
| eye(s)                                   | –                 | 1 (20.0)                        | 3 (6.0)           | 2 (11.1)                             | 2 (4.4)                           | –                                |
| liver                                    | –                 | –                               | 2 (4.0)           | 1 (5.6)                              | 3 (6.7)                           | 1 (4.5)                          |
| other site of infection <sup>h</sup>     | –                 | –                               | 1 (2.0)           | –                                    | 2 (4.4)                           | 2 (9.1)                          |
| disseminated disease <sup>i</sup>        | –                 | –                               | 12 (24.0)         | 5 (27.8)                             | 8 (17.8)                          | 4 (18.2)                         |

Data are *n* (%). Underlying conditions and affected organs might be superadditive. Abbreviations: 1st-AMB, first-line amphotericin B; 1st-POS<sup>new</sup>, first-line posaconazole new formulations; 1st-AMB+POS<sup>new</sup>, first-line amphotericin B + posaconazole new formulations; SAL-POS<sup>susp</sup>, salvage posaconazole oral suspension; SAL-POS<sup>new</sup>, salvage posaconazole new formulations.

<sup>g</sup>Mucorales-NOS, Mucorales not otherwise specified.

<sup>b</sup>Solid tumour includes gastric adenocarcinoma, neuroblastoma, myelofibrosis and urinary cancer.

<sup>c</sup>Other haematological/oncological malignancy, including Fanconi anaemia.

<sup>d</sup>GvHD, graft-versus-host disease.

<sup>e</sup>Major surgery does not include surgery as antifungal therapy.

<sup>f</sup>Viral pneumonia within 30 days prior to diagnosis of the invasive mucormycosis.

<sup>g</sup>Other underlying conditions includes chronic pancreatitis, dental manipulation, malnutrition, near-drowning in a goose pond, severe peptic ulcer disease, sweet syndrome and titanium plate in right orbital ground.

<sup>h</sup>Other sites of infection included catheter-related bloodstream infection, dura, larynx and trachea, thyroid.

<sup>i</sup>Disseminated invasive mucormycosis is defined as an infection with positive blood culture and/or at least two non-adjacent organs affected.

Haematological/oncological malignancy was the most frequently identified risk factor in both 1st-AMB+POS<sup>new</sup> cases (*n*=11; 61.1%) and 1st-AMB controls (*n*=29; 58.0%). Corticosteroids/immunosuppressive administration (*n*=9; 50.0% in the 1st-AMB+POS<sup>new</sup> group versus *n*=29; 58.0% in the 1st-AMB group) and neutropenia (*n*=7; 38.9% in the 1st-AMB+POS<sup>new</sup> group versus *n*=20; 40.0% in the 1st-AMB group) were other common underlying conditions.

Deep soft tissues were the most prevalently affected site in the 1st-AMB+POS<sup>new</sup> group (*n*=9; 50.0%). Moreover, six (33.3%) patients suffered from IM of the lung, and five (27.8%) of the paranasal sinuses. In the 1st-AMB group, most of the patients had a lung IM [21 (42.0%) patients], involvement of deep soft tissues (*n*=17; 34.0%) or the paranasal sinuses (*n*=16; 32.0%). A total of five (27.8%) 1st-AMB+POS<sup>new</sup> cases suffered from disseminated

IM, as did 12 (24.0%) of the 1st-AMB controls (Table 1, Tables S6 and S7).

Patients from the 1st-AMB+POS<sup>new</sup> group received treatment for a median of 15.5 (IQR 8.0–29.0) days, similar to 1st-AMB patients [20.5 (IQR 14.0–46.0) days]. Median time of observation in the 1st-AMB+POS<sup>new</sup> cases [median of 32.0 (IQR 14.0–120.0) days] was longer than in 1st-AMB controls [median of 22.5 (IQR 15.0–62.0) days]. Four (22.2%) patients in the 1st-AMB+POS<sup>new</sup> group reported adverse effects, three (16.7%) due to administration of amphotericin B, two (11.1%) due to posaconazole new formulations and one (5.6%) due to both amphotericin B and posaconazole new formulations. Eight (16.0%) patients in the 1st-AMB control group reported adverse effects (Table 2, Table S8).

A day 42 favourable response was observed in five (27.8%) 1st-AMB+POS<sup>new</sup> patients and in 14 (28.0%) of the 1st-AMB controls

**Table 2.** Treatment details by group

|                                                  | 1st-AMB<br>(n=15) | 1st-POSnew<br>(n=5) | 1st-AMB<br>(n=50) | 1st-AMB+POSnew<br>(n=18) | SAL-POSsusp<br>(n=45) | SAL-POSnew<br>(n=22) |
|--------------------------------------------------|-------------------|---------------------|-------------------|--------------------------|-----------------------|----------------------|
| Other antifungal treatments                      |                   |                     |                   |                          |                       |                      |
| surgery                                          | 8 (53.3)          | 3 (60.0)            | 22 (44.0)         | 8 (44.4)                 | 14 (31.8)             | 6 (27.3)             |
| iron chelators                                   | -                 | -                   | 1 (2.0)           | 2 (11.1)                 | -                     | -                    |
| G-CSF                                            | -                 | -                   | -                 | 1 (5.6)                  | 1 (2.2)               | -                    |
| Antifungal treatment duration (days)             | 33.0 (13.0–45.0)  | 26.0 (9.0–55.0)     | 20.5 (14.0–46.0)  | 15.5 (8.0–29.0)          | 99.0 (43.0–153.0)     | 76.0 (41.0–135.0)    |
| AMB formulation, n (%) <sup>a</sup>              |                   |                     |                   |                          |                       |                      |
| deoxycholate                                     | -                 | -                   | 13 (26.0)         | 4 (22.2)                 | 13 (28.9)             | 2 (9.1)              |
| lipid complex                                    | 3 (20.0)          | -                   | 8 (16.0)          | 5 (27.8)                 | 18 (40.0)             | 2 (9.1)              |
| liposomal                                        | 13 (86.7)         | -                   | 34 (68.0)         | 10 (55.6)                | 19 (42.0)             | 19 (86.4)            |
| POS formulation, n (%) <sup>a</sup>              |                   |                     |                   |                          |                       |                      |
| intravenous suspension                           | -                 | 3 (60.0)            | -                 | 8 (44.4)                 | -                     | 2 (9.1)              |
| tablet                                           | -                 | -                   | -                 | -                        | 45 (100.0)            | -                    |
| tablet                                           | -                 | 3 (60.0)            | -                 | 10 (55.6)                | -                     | 22 (100.0)           |
| Days with AMB before salvage treatment           | -                 | -                   | -                 | -                        | 23.0 (14.0–32.0)      | 20.5 (9.0–42.0)      |
| Duration of observation (days)                   | 36.0 (13.0–62.0)  | 81.0 (68.0–184.0)   | 22.5 (15.0–62.0)  | 32.0 (14.0–120.0)        | 143.0 (76.0–230.0)    | 102.5 (44.0–159.0)   |
| Drug-related adverse effects, n (%) <sup>a</sup> |                   |                     |                   |                          |                       |                      |
| no adverse effects                               | 14 (93.3)         | 5 (100.0)           | 42 (84.0)         | 14 (77.8)                | 39 (86.7)             | 14 (63.6)            |
| adverse effects                                  | 1 (6.7)           | -                   | 8 (16.0)          | 4 (22.2)                 | 6 (13.3)              | 8 (36.4)             |
| after AMB                                        | 1 (6.7)           | -                   | 8 (16.0)          | 3 (16.7)                 | 5 (11.1)              | 7 (31.8)             |
| electrolyte imbalance                            | -                 | -                   | 1 (2.0)           | -                        | 2 (4.4)               | -                    |
| liver dysfunction                                | -                 | -                   | -                 | -                        | -                     | 1 (4.5)              |
| renal dysfunction                                | 1 (6.7)           | -                   | 7 (14.0)          | 3 (16.7)                 | 2 (4.4)               | 4 (18.2)             |
| other <sup>b</sup>                               | -                 | -                   | 1 (2.0)           | -                        | 1 (2.2)               | 2 (9.1)              |
| after POS tablets                                | -                 | -                   | -                 | 2 (11.1)                 | -                     | 1 (4.5)              |
| liver dysfunction                                | -                 | -                   | -                 | 2 (11.1)                 | -                     | -                    |
| giddiness                                        | -                 | -                   | -                 | -                        | -                     | 1 (4.5)              |
| after POS suspension                             | -                 | -                   | -                 | -                        | 1 (2.2)               | -                    |
| thrombocytopenia                                 | -                 | -                   | -                 | -                        | 1 (2.2)               | -                    |

Data are median (IQR) unless otherwise indicated. G-SCF, granulocyte-colony-stimulating factor; AMB, amphotericin B; POS, posaconazole.

<sup>a</sup>Superadditive.

<sup>b</sup>Other adverse effects include exanthema on truncus and limbs, fever and non-stated adverse effects.

(Table 3, Table S9). At day 42, 6 (33.3%) 1st-AMB+POSnew patients had died, as had 26 (52.0%) in the 1st-AMB group. Mortality analysis showed similar values for both groups on day 42 for crude and weighted mortality (Table 4). On day 84 Kaplan-Meier survival curves, 1st-AMB+POSnew patients (59.3%) demonstrated a higher survival probability than 1st-AMB patients (33.9%), without reaching statistical significance ( $P=0.202$ ) (Figure 2b).

SAL-POSnew was administered in 22 cases, who were matched with 45 controls receiving SAL-POSsusp (Figure 1, Table S4). SAL-POSnew cases were diagnosed between 2008 and 2017; 21 (95.4%) patients were adults. SAL-POSsusp controls were diagnosed between 2000 and 2018; 41 (91.1%) were adults (Table 1).

*Rhizopus* spp. was reported as the causative pathogen in nine (40.9%) cases receiving SAL-POSnew. Other SAL-POSnew patients had IM due to *Mucor* spp. ( $n=5$ ; 22.7%) and *Lichtheimia* spp. ( $n=4$ ; 18.2%). The most frequently observed causative pathogens in the SAL-POSsusp group were *Mucor* spp. and *Rhizopus* spp. ( $n=12$ ;

26.7% each), Mucorales-NOS ( $n=11$ ; 24.4%) and *Lichtheimia* spp. ( $n=8$ ; 17.8%). Six (27.3%) SAL-POSnew cases had a coinfection, four (18.2%) with *Aspergillus* spp. and one (4.5%) each with *Candida* spp. and *Cladosporium* spp. Overall, eight (17.8%) SAL-POSsusp controls presented coinfections, five (11.1%) with *Aspergillus* spp. and one (2.2%) each with *Aspergillus* spp. + *Penicillium* spp., *Candida* spp. and *Paecilomyces* spp. (Table 1, Tables S5 and S6).

Haematological/oncological malignancy ( $n=10$ ; 45.5% SAL-POSnew cases versus  $n=30$ ; 66.7% SAL-POSsusp controls) and corticosteroids/immunosuppressive administration ( $n=13$ ; 59.1% SAL-POSnew cases versus  $n=18$ ; 40.0%) were the most prevalent underlying conditions for patients in the salvage treatment group. Neutropenia was also a relevant risk factor in both groups ( $n=7$ ; 31.8% SAL-POSnew cases versus  $n=15$ ; 33.3% SAL-POSsusp controls).

Lung was the most frequently affected organ in both groups, including nine (40.5%) patients in SAL-POSnew cases and 23

**Table 3.** Response to treatment by group

|                       | 1st-AMB<br>(n=15) | 1st-POSnew<br>(n=5) | 1st-AMB<br>(n=50) | 1st-AMB+POSnew<br>(n=18) | SAL-POSSusp<br>(n=45) | SAL-POSnew<br>(n=22) |
|-----------------------|-------------------|---------------------|-------------------|--------------------------|-----------------------|----------------------|
| Day 42                |                   |                     |                   |                          |                       |                      |
| favourable response   | 3/15 (20.0)       | 4/5 (80.0)          | 14/50 (28.0)      | 5/18 (27.8)              | 26/45 (57.8)          | 11/22 (50.0)         |
| complete response     | 2/15 (13.3)       | –                   | 6/50 (12.0)       | 2/18 (11.1)              | 12/45 (26.7)          | 4/22 (18.2)          |
| partial response      | 1/15 (6.7)        | 4/5 (80.0)          | 8/50 (16.0)       | 3/18 (16.7)              | 14/45 (31.1)          | 7/22 (31.8)          |
| unfavourable response | 2/15 (13.3)       | –                   | 5/50 (10.0)       | 3/18 (16.7)              | 16/45 (35.6)          | 7/22 (31.8)          |
| stable disease        | 2/15 (13.3)       | –                   | 3/50 (6.0)        | 2/18 (11.1)              | 9/45 (20.0)           | 4/22 (18.2)          |
| progression           | –                 | –                   | 2/50 (4.0)        | 1/18 (5.6)               | 7/45 (15.6)           | 3/22 (13.6)          |
| not applicable        | 8/15 (53.3)       | 1/5 (20.0)          | 26/50 (52.0)      | 6/18 (33.3)              | 2/45 (4.4)            | –                    |
| lost to follow-up     | 2/15 (13.3)       | –                   | 5/50 (10.0)       | 4/18 (22.2)              | 1/45 (2.2)            | 4/22 (18.2)          |
| Day 84                |                   |                     |                   |                          |                       |                      |
| favourable response   | 2/15 (13.3)       | 2/5 (40.0)          | 10/50 (20.0)      | 6/18 (33.4)              | 22/45 (48.9)          | 7/22 (31.8)          |
| complete response     | 2/15 (13.3)       | –                   | 5/50 (10.0)       | 3/18 (16.7)              | 8/45 (17.8)           | 2/22 (9.1)           |
| partial response      | –                 | 2/5 (40.0)          | 5/50 (10.0)       | 3/18 (16.7)              | 14/45 (31.1)          | 5/22 (22.7)          |
| unfavourable response | –                 | –                   | –                 | 1/18 (5.6)               | 11/45 (24.5)          | 5/22 (22.7)          |
| stable disease        | –                 | –                   | –                 | 1/18 (5.6)               | 8/45 (17.8)           | 3/22 (13.6)          |
| progression           | –                 | –                   | –                 | –                        | 3/45 (6.7)            | 2/22 (9.1)           |
| not applicable        | 9/15 (60.0)       | 1/5 (20.0)          | 30/50 (60.0)      | 7/18 (38.9)              | 5/45 (11.1)           | 1/22 (4.5)           |
| lost to follow-up     | 4/15 (26.7)       | 2/5 (40.0)          | 10/50 (20.0)      | 4/18 (22.2)              | 7/45 (15.6)           | 9/22 (40.9)          |
| Final day             |                   |                     |                   |                          |                       |                      |
| favourable response   | 6/15 (40.0)       | 4/5 (80.0)          | 19/50 (38.0)      | 9/18 (50.0)              | 30/45 (66.7)          | 17/22 (77.2)         |
| complete response     | 6/15 (40.0)       | 2/5 (40.0)          | 18/50 (36.0)      | 8/18 (44.4)              | 21/45 (46.7)          | 16/22 (72.7)         |
| partial response      | –                 | 2/5 (40.0)          | 1/50 (2.0)        | 1/18 (5.6)               | 9/45 (20.0)           | 1/22 (4.5)           |
| unfavourable response | 9/15 (60.0)       | 1/5 (20.0)          | 31/50 (62.0)      | 9/18 (50.0)              | 15/45 (33.3)          | 5/22 (22.7)          |
| stable disease        | 2/15 (13.3)       | –                   | 3/50 (6.0)        | 1/18 (5.6)               | 4/45 (8.9)            | 2/22 (9.1)           |
| progression           | 7/15 (46.7)       | 1/5 (20.0)          | 28/50 (56.0)      | 8/18 (44.4)              | 11/45 (24.4)          | 3/22 (13.6)          |

Data are *n/N* (%). Day 0 was considered the day when treatment started. Complete response, resolution of all attributable signs and symptoms of disease, radiological abnormalities (persistence of only a scar or postoperative changes can be equated with a complete radiological response) and mycological evidence of eradication of disease. Partial response, improvement in attributable signs and symptoms of disease, radiological abnormalities (at least 25% reduction in diameter of radiological lesion) and evidence of clearance of cultures or reduction of fungal burden. In cases of radiological stabilization (defined as a 0%–25% reduction in the diameter of the lesion), resolution of all attributable symptoms and signs of fungal disease can be equated with a partial response. Stable disease, minor or no improvement in fungal disease but no evidence of progression, as determined on the basis of a composite of clinical, radiological and mycological criteria or persistent isolation of mould or histological presence of invasive hyphae in infected sites. Progression, evidence of progressive fungal disease based on a composite of clinical, radiological and mycological criteria. Not applicable, patient has already died before the respective timepoint. Lost to follow-up, patient has already been discharged alive before the respective timepoint.

(51.1%) patients in SAL-POSSusp controls. Seventeen (37.8%) controls presented with localized disease, and, in six (13.3%) cases, an adjacent organ was involved. The number of disseminated cases of IM was similar between SAL-POSnew cases (*n*=4; 18.2%) and SAL-POSSusp controls (*n*=8; 17.8%) (Table 1, Tables S6 and S7).

SAL-POSnew patients received treatment for a median of 76.0 (IQR 41.0–135.0) days, a shorter time than patients in the SAL-POSSusp group [99.0 (IQR 43.0–153.0) days]. SAL-POSnew patients' final assessment of treatment response [median of 102.0 (IQR 44.0–159.0) days] was documented earlier than for SAL-POSSusp controls [median of 143.0 (IQR 76.0–230.0) days]. For eight (36.4%) SAL-POSnew patients, adverse effects were reported [*n*=7; 31.8% related to amphotericin B use and one (4.5%) to posaconazole new formulations], compared with six (13.3%) SAL-POSSusp patients [*n*=5; 11.1% related to amphotericin B use and one (2.2%) to posaconazole oral suspension] (Table 2, Table S8).

A day 42 favourable response was observed in 11 (50.0%) SAL-POSnew patients, and in 26 (57.8%) SAL-POSSusp controls (Table 3, Table S9). However, all SAL-POSnew patients were alive at day 42, as compared with 43 (95.6%) patients in the SAL-POSSusp group. Additionally, four (18.2%) SAL-POSnew patients were already discharged alive on day 42 compared with one (2.2%) from the SAL-POSSusp group. Weighted and crude mortality at day 42 were similar for the SAL-POSnew and the SAL-POSSusp groups (Table 4). On day 84 Kaplan–Meier survival curves, SAL-POSnew patients had a higher survival probability (94.4%) than SAL-POSSusp patients (88.4%), without reaching statistical significance (*P*=0.504) (Figure 2c).

## Discussion

Since the legal approval and marketing of posaconazole new formulations, further and improved treatment options have become



**Table 4.** Mortality by group

|                                       | 1st-AMB<br>(n=15)          | 1st-POSnew<br>(n=5)      | P     | 1st-AMB<br>(n=50)           | 1st-AMB+POSnew<br>(n=18)   | P     | SAL-POSSusp<br>(n=45)       | SAL-POSnew<br>(n=22)      | P     |
|---------------------------------------|----------------------------|--------------------------|-------|-----------------------------|----------------------------|-------|-----------------------------|---------------------------|-------|
| Diagnosis post-mortem                 | -                          | -                        | -     | 2 (4.0)                     | -                          | -     | -                           | -                         | -     |
| Death attributable to IFI             | 5 (33.3)                   | 1 (20.0)                 | -     | 24 (48.0)                   | 5 (27.8)                   | -     | 5 (11.1)                    | 1 (4.5)                   | -     |
| Autopsy                               | 1 (6.7)                    | -                        | -     | 4 (8.0)                     | 1 (5.6)                    | -     | 6 (13.3)                    | -                         | -     |
| Day of death                          | 18.0 (7.0-36.0)            | 109.5 (35.0-184.0)       | -     | 16.5 (8.0-21.0)             | 17.0 (8.0-46.0)            | -     | 113 (46.0-223.0)            | 117.5 (68.5-161.5)        | -     |
| Crude                                 |                            |                          |       |                             |                            |       |                             |                           |       |
| day 42 all-cause mortality            | 8/15 (53.3)<br>[26.6-78.7] | 1/5 (20.0)<br>[0.5-71.6] | 0.319 | 26/50 (52.0)<br>[37.4-66.3] | 6/18 (33.3)<br>[13.3-59.0] | 0.271 | 2/45 (4.4)<br>[0.5-15.1]    | 0/22 (0.0)<br>[0.0-15.4]  | 1.000 |
| day 84 all-cause mortality            | 9/15 (60.0)<br>[32.3-83.7] | 1/5 (20.0)<br>[5.0-71.6] | 0.303 | 30/50 (60.0)<br>[45.2-73.6] | 7/18 (38.9)<br>[17.3-64.3] | 0.169 | 5/45 (11.1)<br>[3.7-24.1]   | 1/22 (4.5)<br>[0.1-22.8]  | 0.655 |
| final day all-cause mortality         | 9/15 (60.0)<br>[32.3-83.7] | 2/5 (40.0)<br>[5.3-85.3] | 0.617 | 30/50 (60.0)<br>[45.2-73.6] | 9/18 (50.0)<br>[26.0-74.0] | 0.580 | 15/45 (33.3)<br>[20.0-49.0] | 4/22 (18.2)<br>[5.2-40.3] | 0.255 |
| By matching covariates                |                            |                          |       |                             |                            |       |                             |                           |       |
| haematological/oncological malignancy | 8/15 (53.3)                | 2/5 (40.0)               | -     | 23/50 (46.0)                | 7/18 (38.9)                | -     | 11/45 (24.4)                | 3/22 (13.6)               | -     |
| severe disease <sup>a</sup>           | -                          | -                        | -     | 11/50 (22.0)                | 4/18 (22.2)                | -     | 6/45 (13.3)                 | -                         | -     |
| surgical treatment <sup>b</sup>       | 3/15 (20.0)                | 2/5 (40.0)               | -     | 9/50 (18.0)                 | 3/18 (16.7)                | -     | 6/45 (13.3)                 | -                         | -     |
| renal dysfunction <sup>c</sup>        | 2/15 (13.3)                | -                        | -     | 11/50 (22.0)                | 4/18 (22.2)                | -     | -                           | -                         | -     |
| Weighted <sup>d</sup>                 |                            |                          |       |                             |                            |       |                             |                           |       |
| day 42 all-cause mortality            | 53.3 (38.8-67.9)           | 20.0 (0.0-40.2)          | 0.025 | 51.4 (43.2-59.6)            | 32.0 (19.1-44.9)           | 0.018 | 5.3 (1.2-9.4)               | 0.0 (0.0-0.0)             | 1.000 |
| day 84 all-cause mortality            | 60.0 (45.7-74.3)           | 20.0 (0.0-40.2)          | 0.007 | 58.3 (50.3-66.4)            | 38.0 (24.5-51.5)           | 0.013 | 11.5 (5.6-17.4)             | 6.7 (0.0-14.0)            | 0.560 |
| final day all-cause mortality         | 60.0 (45.7-74.3)           | 40.0 (15.2-64.8)         | 0.178 | 58.3 (50.3-66.4)            | 50.0 (36.1-63.9)           | 0.306 | 35.4 (26.6-44.2)            | 22.2 (10.1-34.4)          | 0.108 |

Data for crude mortality are *n/N* (%) [95% CI]. 95% CI is based on Clopper-Pearson's binomial exact method. *P* values are calculated from Fisher's exact test. Data for weighted mortality are *n* (%) [95% CI]. 95% CI is based on Wald normal approximation method. *P* values are calculated from  $\chi^2$  test except for day 84, calculated with Fisher's exact test.

<sup>a</sup>CNS involvement and/or disseminated disease (involvement of more than one non-contiguous organ or pathogen isolated from blood).

<sup>b</sup>Surgical treatment defined as debridement or resection within 14 days since invasive mucormycosis diagnosis at site of infection.

<sup>c</sup>Renal dysfunction was categorized based on a GFR <90 mL/min at antifungal treatment initiation.

<sup>d</sup>Patients were weighted with respect to the ratio of the amount of controls matched to each case.

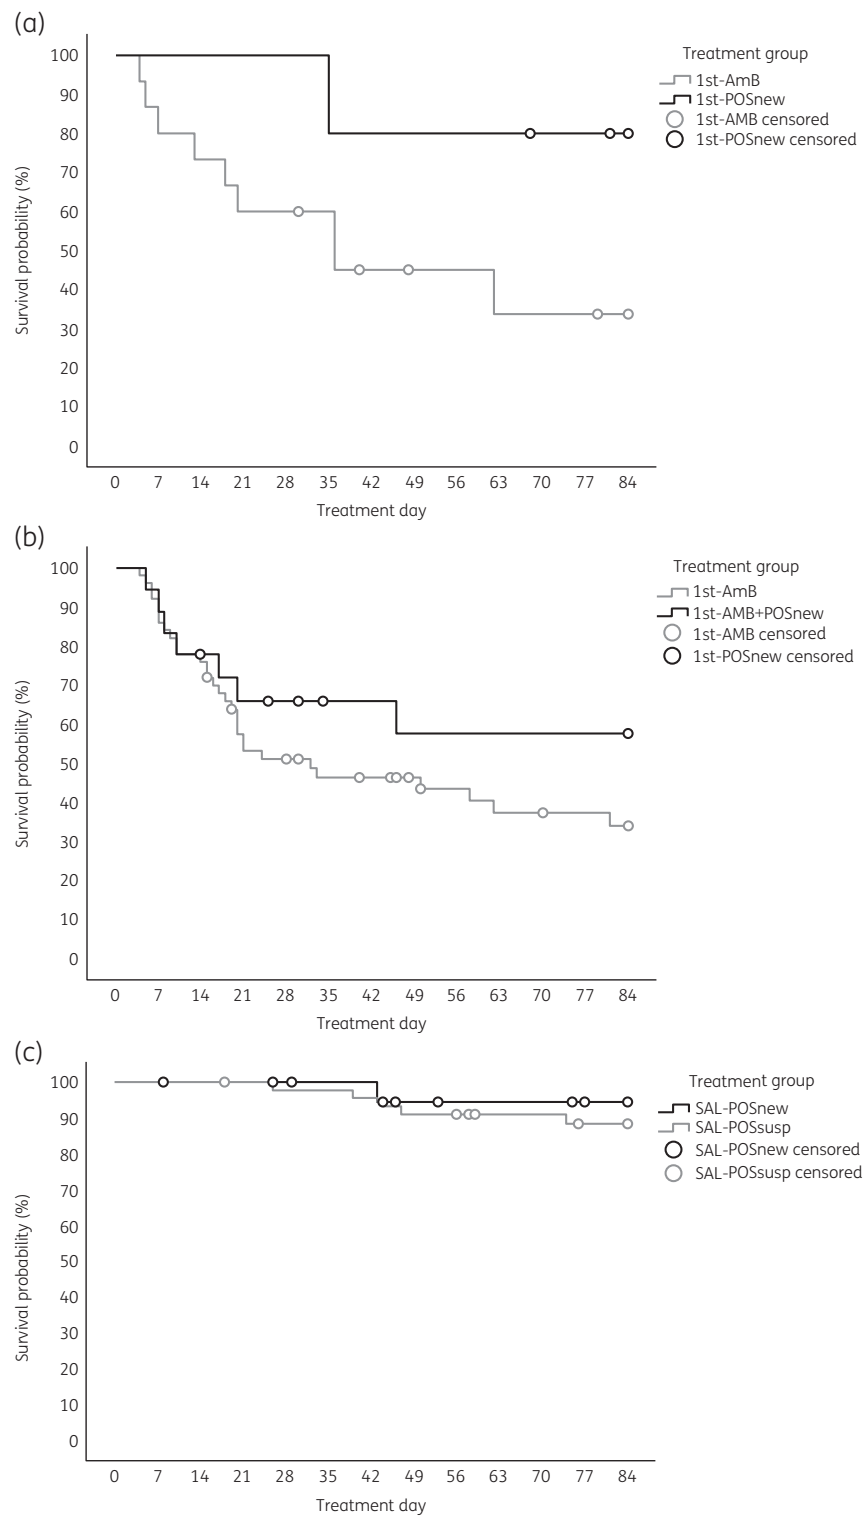

**Figure 2.** Kaplan–Meier analysis of patients receiving posaconazole new formulations versus standard treatments. Patients were censored on their last known survival status day, represented by open circles. (a) 1st-POSnew compared with 1st-AMB matched controls at day 84 after treatment start. Day 84 after diagnosis (log rank  $P=0.117$ ). (b) 1st-AMB+POSnew compared with 1st-AMB matched controls at day 84 after treatment start. Day 84 after diagnosis (log rank  $P=0.202$ ). (c) SAL-POSnew compared with SAL-POSSusp matched controls at day 84 after treatment start. Day 84 of treatment (log rank  $P=0.504$ ).

available. Our study is, to our knowledge, the first matched-paired analysis that assesses the clinical effectiveness and safety of posaconazole new formulations in comparison with amphotericin B as first-line treatment and with posaconazole oral suspension as salvage treatment of IM.

Most of the patients recruited into the study were haematological/oncological patients and/or patients receiving immunosuppressive treatment, analogous to the previously described populations at risk (Table 1, Table S6).<sup>1,2,11,31</sup> In line with the available body of evidence, the lung is the organ most frequently affected by IM, followed by the paranasal sinuses and deep soft tissues.<sup>6,11,31</sup> Nevertheless, due to the small sample size available, as well as the low incidence, the site of infection appears to be heterogeneous among groups. However, the site of infection distribution according to severity, meaning CNS involvement and/or dissemination versus localized infection, was similar between all groups (Table 1, Table S7).

Concerning response, 1st-POSnew and 1st-AMB+POSnew treatment was associated with a higher proportion of favourable response to treatment and discharge alive at day 42 and 84 than their controls receiving 1st-AMB treatment (Table 3, Table S9). This suggests that posaconazole new formulations may be an alternative for the treatment of IM in the first-line and salvage setting.

IM is characterized by its high mortality rates, especially in patients with disseminated disease.<sup>1,2,7</sup> In this study, mortality rates, in both crude and weighted analyses, were lower for the 1st-POSnew and 1st-AMB+POSnew patients compared with their controls receiving 1st-AMB, resembling previously reported mortality rates.<sup>11,31</sup> Likewise, posaconazole new formulations were associated with a trend towards higher survival probability in salvage treatment patients compared with posaconazole oral suspension (Table 4, Figure 2). However, the three Kaplan–Meier analyses showed no significant difference between groups in which standard treatments (1st-AMB or SAL-POSsusp) or posaconazole new formulations (1st-POSnew, 1st-AMB+POSnew or SAL-POSnew) were used. These results should be interpreted with caution given the small sample size available for analysis.

Overall, drug-related adverse effects were rarely reported due to administration of posaconazole new formulations: liver dysfunction in two patients treated with 1st-AMB+POSnew; giddiness in one patient in the SAL-POSnew group; but no effects in the patients in the 1st-POSnew group. Although drug-related renal dysfunction was reported in 7 (15.6%) of a total of 45 patients receiving posaconazole new formulations, as either first-line or salvage treatment, this adverse event was most probably attributable to the simultaneous administration of amphotericin B, as its nephrotoxicity is well known and documented.<sup>8–12</sup> The low rate of adverse drug events supports the utilization of posaconazole new formulations as an appropriate alternative for patients with IM,<sup>32</sup> especially in those with renal failure (Table 2, Table S8).

Besides the retrospective nature of its design, this survey is limited by several factors. Firstly, there is a selection bias, as we only considered patients with a proven or probable diagnosis through culture, microscopy, cytology and/or histology, following the recommendations of the EORTC/MSG criteria,<sup>27</sup> and excluded patients diagnosed through other methods, such as PCR. Further selection bias might have been caused by a tendency to select cases with a favourable outcome for documentation in the registry. Secondly, we were able to identify only a small number of patients in

the posaconazole new formulations groups receiving first-line treatment. Despite our initial goal of 25 cases per group, we could not identify enough cases of patients receiving posaconazole new formulations, even after inclusion of patients with combined administration with amphotericin B in the analysis and extensive communications with national and international networks and colleagues worldwide. This is perhaps unsurprising given the limited usage of posaconazole new formulations alone for first-line treatment of IM, combined with the rarity of IM and the recent introduction of isavuconazole.<sup>5</sup> Unfortunately, this limitation in sample size is further complicated by the heterogeneous exposure to different drugs used to treat IM. Some patients in the posaconazole new formulations groups received both the intravenous and oral delayed-release formulation. Others received additional agents active against Mucorales, including isavuconazole, amphotericin B and/or posaconazole oral suspension, and experienced a switch in their original antifungal treatment. In the control group, there was also a certain degree of heterogeneity, as different amphotericin B formulations compared were grouped together. Finally, we were not able to include the influence of therapeutic drug monitoring in our analysis, as it was not performed in all cases. Overall, these limitations, and in particular the limited sample size, weaken the generalizability of our results and hamper further differentiation of specific effects of intravenous posaconazole and the oral delayed-release formulation.

In conclusion, even though amphotericin B remains the standard of care for treatment of IM, posaconazole new formulations may represent a suitable alternative for the treatment of IM, especially for patients with renal impairment. However, this recommendation must be interpreted with caution, mainly based on the limited sample size of our study.

### Members of the FungiScope® ECMM/ISHAM Working Group

Reham Abdelaziz KHEDR, Alberto ARENCIBIA-NÚÑEZ, Martha AVILÉS-ROBLES, Ingo BANKE, Ariful BASHER, Keertilaxmi BENACHINAMARDI, Harmut BERTZ, Arunaloke CHAKRABARTI, Lubos DRGONA, Jesús GARCÍA-MARTÍNEZ, Julio GARCÍA-RODRÍGUEZ, Sandra GRÄBER, Georg HÄRTER, Michael KLEIN, Michal KOUBA, Dong-Gun LEE, Yohann LE GOVIC, Fabian LEO, Johan MAERTENS, Georg MASCHMEYER, Lisa MEINTKER, Xiao-Dong MO, Lena-Katharina MÜLLER, Nicolas MÜLLER, Jeremy Stephen NEL, Jan NOVÁK, Atul PATEL, Frieder PFÄFFLIN, Juan-Carlos POZO-LADERAS, Pedro PUERTA-ALCALDE, Azucena RODRÍGUEZ-GUARDADO, Roland SCHROERS, Vandana SHEKAR, Susan SHENOI, Gerda SILLING, Donald VINH, Salomón WAIZEL-HAIAT, Mandy Yap YEE YEE, Peralam Yegneswaran PRAKASH and Pavel ŽÁK.

### Funding

This work was supported by Merck & Co., Inc., Kenilworth, NJ, USA.

### Transparency declarations

P. K. has received non-financial scientific grants from Miltenyi Biotec GmbH, Bergisch Gladbach, Germany and the Cologne Excellence Cluster on Cellular Stress Responses in Aging-Associated Diseases (CECAD), University of Cologne, Cologne, Germany; and received lecture honoraria from Astellas

Pharma, Gilead Sciences and MSD Sharp & Dohme GmbH outside the submitted work. S. C. M. is a consultant to Octapharma outside the submitted work. R. H. reports personal fees from Astellas, Basilea, Gilead, Pfizer and MSD; and grants from Gilead and Pfizer outside the submitted work. N. K. has received personal fees from Astellas and Merck; and grants and personal fees from Pfizer outside the submitted work. G. D. has been invited to scientific congresses by Pfizer, Astellas Pharma, Gilead Sciences and MSD Sharp & Dohme outside the submitted work. A. B. has been supported by the Project of Ministry of Education, Science and Technology of the Republic of Serbia (No. III45005) outside the submitted work. C. G-V. has received honoraria for talks on behalf of Gilead Science, Merck Sharp & Dohme, Pfizer, Janssen, Novartis and Lilly; grant support from Gilead Sciences and Merck Sharp & Dohme; research grants from the Spanish Ministry of Health and Consumption, Health Institute Carlos III - General Subdirectorate for Evaluation (FIS PI18/01061), the European Regional Development Fund (ERDF), MSD (2018-00020723) and the INTENSIFICACIÓ Grant by the Catalan Health Agency [PERIS (Pla Estratègic de Recerca i Innovació en Salut - Strategic Plan for Research and Innovation in Health Care)]; and her group is recognized by the AGAUR (Project 2017SGR1432) of the Catalan Health Agency outside the submitted work. M. H. reports grant funding from Gilead and the NIH outside the submitted work. G. K. reports personal fees from Astellas Pharma, Gilead Sciences, Merck Sharp & Dohme, Pfizer and Sandoz outside the submitted work. W. J. H. has received research grants from MSD Sharp & Dohme/Merck and Pfizer; serves on the speakers' bureaus of Alexion, Astellas, Basilea, Bristol-Myers Squibb, Gilead Sciences, Janssen, MSD Sharp & Dohme and Pfizer; and received travel grants from Alexion, Astellas, Lilly, MSD Sharp & Dohme, Novartis and Pfizer outside the submitted work. R. K. received research grants from Merck and served on the speakers' bureau of Pfizer, Gilead, Astellas, Basilea, Merck and Angelini outside the submitted work. O. P. has received honoraria and travel support from Astellas, Gilead, Jazz, MSD, Neovii Biotech and Pfizer; and research support from Bio Rad, Gilead, Jazz, Neovii Biotech, Pierre Fabre, Sanofi and Takeda outside the submitted work. He is member of the advisory board to Jazz, Gilead MSD, Omeros and SOBI. D. C. S. has received speaker fees for MSD and Astellas and is on the advisory board for MSD and AVIR outside the submitted work. J. J. V. has personal fees from Merck/MSD, Gilead, Pfizer, Astellas Pharma, Basilea, German Centre for Infection Research (DZIF), University Hospital Freiburg/Congress and Communication, Academy for Infectious Medicine, University Manchester, German Society for Infectious Diseases (DGI), Ärztekammer Nordrhein, University Hospital Aachen, Back Bay Strategies, German Society for Internal Medicine (DGIM); and grants from Merck/MSD, Gilead, Pfizer, Astellas Pharma, Basilea, German Centre for Infection Research (DZIF) and German Federal Ministry of Education and Research (BMBF) outside the submitted work. O. A. C. is supported by the German Federal Ministry of Research and Education and the European Commission, and has received research grants from, is an advisor to or received lecture honoraria from, Actelion, Allegra Therapeutics, Amplyx, Astellas, Basilea, Biosys UK Limited, Cidara, Da Volterra, Entasis, F2G, Gilead, IQVIA, Janssen Pharmaceuticals, Matinas, Medicines Company, MedPace, Melinta Therapeutics, Menarini Ricerche, Merck/MSD, Octapharma, Paratek Pharmaceuticals, Pfizer, PSI, Rempex, Scynexis, Seres Therapeutics, Tetrphase and Vical outside the submitted work. M. J. G. T. V. has served on the speakers' bureau of Uniklinik Freiburg/Kongress und Kommunikation, Akademie für Infektionsmedizin, Ärztekammer Nordrhein, Astellas Pharma, Basilea, Falck, Gilead Sciences, Merck/MSD, Organobalance and Pfizer; received research funding from 3M, Astellas Pharma, DaVolterra, Gilead Sciences, Glycom, MaaT Pharma, Morphochem, Organobalance and Seres Therapeutics; is a consultant to Alb-Fils Kliniken GmbH, Ardeypharm, Astellas Pharma, Berlin Chemie, DaVolterra, Ferring, MaaT Pharma and Merck/MSD outside the submitted work; and has received research funding from Merck & Co., Inc., Kenilworth, NJ, USA for this submitted work. The remaining authors have none to declare.

## Author contributions

J. S.-G. enrolled patients and performed formal validation of the clinical details, extracted data from FungiScope<sup>®</sup> patients, performed the statistical analysis and interpreted the data, wrote the initial draft of the manuscript, created tables and figures and revised and approved the final manuscript. D. S. was the FungiScope<sup>®</sup> project manager, enrolled patients, performed formal and medical validation of the clinical details and revised and approved the final manuscript. P. K. and S. C. M. provided clinical details from local patients, performed medical validation of the clinical details and revised and approved the final manuscript. R. H., N. K., Z. R., I. F-R., P. I., M. A. B-P., J. Y. R., G. D., A. B., C. G-V., M. H., S. R. M., M. P. C., G. K., W. J. H., N. I., R. K., H. O., O. P., E. S., D. C. S., and B. W. provided clinical details from local patients and revised and approved the final manuscript. H. W. was in charge of FungiThek (the biobank of FungiScope<sup>®</sup>) and revised and approved the final manuscript. J. J. V. conceived the study idea and revised and approved the final manuscript. O. A. C. invented and led FungiScope<sup>®</sup>, conceived the study idea, provided clinical details from local patients and revised and approved the final manuscript. M. J. G. T. V. conceived the study idea, led the research consortium, provided clinical details from local patients and revised and approved the final manuscript.

## Supplementary data

Tables S1 to S9 are available as [Supplementary data](#) at JAC Online.

## Acknowledgements

This study was partially presented at the Annual Meeting of the German Center for Infection Research—Deutsches Zentrum für Infektionsforschung (DZIF) 2018, Heidelberg, Germany (Poster Presentation P57), at the 29th European Congress of Clinical Microbiology and Infectious Diseases (ECCMID) 2019, Amsterdam, the Netherlands (Poster Presentation P2251), at the XXIII National Congress of the Spanish Society of Infectious Diseases and Clinical Microbiology – Sociedad Española de Enfermedades Infecciosas y Microbiología Clínica (SEIMC) 2019, Madrid, Spain (Poster Presentation 0332), at the American Society for Microbiology (ASM) Microbe 2019, San Francisco, USA (Poster Presentation SUNDAY—CIV-160), at ID Week 2019, Washington DC, USA (Poster Presentation 2119) and at the 9th Trends in Medical Mycology (TIMM) 2019, Nice, France (Poster Presentation P400).

## References

- Guinea J, Escribano P, Vena A et al. Increasing incidence of mucormycosis in a large Spanish hospital from 2007 to 2015: epidemiology and microbiological characterization of the isolates. *PLoS One* 2017; **12**: 1–10.
- Pana ZD, Seidel D, Skiada A et al. Invasive mucormycosis in children: an epidemiologic study in European and non-European countries based on two registries. *BMC Infect Dis* 2016; **16**: 667.
- Kontoyannis DP, Marr KA, Park BJ et al. Prospective surveillance for invasive fungal infections in hematopoietic stem cell transplant recipients, 2001–2006: overview of the Transplant-Associated Infection Surveillance Network (TRANSNET) Database. *Clin Infect Dis* 2010; **50**: 1091–100.
- Park BJ, Pappas PG, Wannemuehler KA et al. Invasive non-Aspergillus mold infections in transplant recipients, United States, 2001–2006. *Emerg Infect Dis* 2011; **17**: 1855–64.
- Cornely OA, Arikan-Akdagli S, Dannaoui E et al. ESCMID and ECMM joint clinical guidelines for the diagnosis and management of mucormycosis 2013. *Clin Microbiol Infect* 2014; **20** Suppl 3: 5–26.

- 6** Roden MM, Zaoutis TE, Buchanan WL *et al.* Epidemiology and outcome of zygomycosis: a review of 929 reported cases. *Clin Infect Dis* 2005; **41**: 634–53.
- 7** Chamilos G, Lewis RE, Kontoyiannis DP. Delaying amphotericin B-based frontline therapy significantly increases mortality among patients with hematologic malignancy who have zygomycosis. *Clin Infect Dis* 2008; **47**: 503–9.
- 8** Spellberg B, Walsh TJ, Kontoyiannis DP *et al.* Recent advances in the management of mucormycosis: from bench to bedside. *Clin Infect Dis* 2009; **48**: 1743–51.
- 9** Walsh TJ, Teppler H, Donowitz GR *et al.* Caspofungin versus liposomal amphotericin B for empirical antifungal therapy in patients with persistent fever and neutropenia. *N Engl J Med* 2004; **351**: 1391–402.
- 10** Kim JH, Benefield RJ, Ditolla K. Utilization of posaconazole oral suspension or delayed-released tablet salvage treatment for invasive fungal infection. *Mycoses* 2016; **59**: 726–33.
- 11** Lantermier F, Poiree S, Elie C *et al.* Prospective pilot study of high-dose (10 mg/kg/day) liposomal amphotericin B (L-AMB) for the initial treatment of mucormycosis. *J Antimicrob Chemother* 2015; **70**: 3116–23.
- 12** Safdar A, Ma J, Saliba F *et al.* Drug-induced nephrotoxicity caused by amphotericin B lipid complex and liposomal amphotericin B: a review and meta-analysis. *Medicine (Baltimore)* 2010; **89**: 236–44.
- 13** Almyroudis NG, Sutton DA, Fothergill AW *et al.* In vitro susceptibilities of 217 clinical isolates of zygomycetes to conventional and new antifungal agents. *Antimicrob Agents Chemother* 2007; **51**: 2587–90.
- 14** Sabatelli F, Patel R, Mann PA *et al.* In vitro activities of posaconazole, fluconazole, itraconazole, voriconazole, and amphotericin B against a large collection of clinically important molds and yeasts. *Antimicrob Agents Chemother* 2006; **50**: 2009–15.
- 15** Vehreschild JJ, Birtel A, Vehreschild MJ *et al.* Mucormycosis treated with posaconazole: review of 96 case reports. *Crit Rev Microbiol* 2013; **39**: 310–24.
- 16** van Burik JA, Hare RS, Solomon HF *et al.* Posaconazole is effective as salvage therapy in zygomycosis: a retrospective summary of 91 cases. *Clin Infect Dis* 2006; **42**: e61–5.
- 17** Fortún J, Gioia F, Cardozo C *et al.* Posaconazole salvage therapy: the Posifi study. *Mycoses* 2019; **62**: 526–533.
- 18** Beatty N, Al Mohajer M. Primary cutaneous mucormycosis developing after incision and drainage of a subcutaneous abscess in an immunocompetent host. *BMJ Case Rep* 2016; pii: bcr2015213700.
- 19** Cumpston A, Caddell R, Shillingburg A *et al.* Superior serum concentrations with posaconazole delayed-release tablets compared to suspension formulation in hematological malignancies. *Antimicrob Agents Chemother* 2015; **59**: 4424–8.
- 20** Krishna G, Ma L, Martinho M *et al.* Single-dose phase I study to evaluate the pharmacokinetics of posaconazole in new tablet and capsule formulations relative to oral suspension. *Antimicrob Agents Chemother* 2012; **56**: 4196–201.
- 21** Krishna G, Ma L, Martinho M *et al.* A new solid oral tablet formulation of posaconazole: a randomized clinical trial to investigate rising single- and multiple-dose pharmacokinetics and safety in healthy volunteers. *J Antimicrob Chemother* 2012; **67**: 2725–30.
- 22** Maertens J, Cornely OA, Ullmann AJ *et al.* Phase 1B study of the pharmacokinetics and safety of posaconazole intravenous solution in patients at risk for invasive fungal disease. *Antimicrob Agents Chemother* 2014; **58**: 3610–7.
- 23** Cornely OA, Duarte RF, Haider S *et al.* Phase 3 pharmacokinetics and safety study of a posaconazole tablet formulation in patients at risk for invasive fungal disease. *J Antimicrob Chemother* 2016; **71**: 718–26.
- 24** Doring M, Cabanillas Stanchi KM, Queudeville M *et al.* Efficacy, safety and feasibility of antifungal prophylaxis with posaconazole tablet in paediatric patients after haematopoietic stem cell transplantation. *J Cancer Res Clin Oncol* 2017; **143**: 1281–92.
- 25** Seidel D, Durán Graeff LA, Vehreschild M *et al.* FungiScope™-Global Emerging Fungal Infection Registry. *Mycoses* 2017; **60**: 508–16.
- 26** Rüping MJ, Heinz WJ, Kindo AJ *et al.* Forty-one recent cases of invasive zygomycosis from a global clinical registry. *J Antimicrob Chemother* 2010; **65**: 296–302.
- 27** De Pauw B, Walsh TJ, Donnelly JP *et al.* Revised definitions of invasive fungal disease from the European Organization for Research and Treatment of Cancer/Invasive Fungal Infections Cooperative Group and the National Institute of Allergy and Infectious Diseases Mycoses Study Group (EORTC/MSG) Consensus Group. *Clin Infect Dis* 2008; **46**: 1813–21.
- 28** Verweij PE, Gonzalez GM, Wiederhold NP *et al.* In vitro antifungal activity of isavuconazole against 345 Mucorales isolates collected at study centers in eight countries. *J Chemother* 2009; **21**: 272–81.
- 29** Alastruey-Izquierdo A, Castelli MV, Cuesta I *et al.* In vitro activity of antifungals against Zygomycetes. *Clin Microbiol Infect* 2009; **15** Suppl 5: 71–6.
- 30** Segal BH, Herbrecht R, Stevens DA *et al.* Defining responses to therapy and study outcomes in clinical trials of invasive fungal diseases: Mycoses Study Group and European Organization for Research and Treatment of Cancer consensus criteria. *Clin Infect Dis* 2008; **47**: 674–83.
- 31** Marty FM, Ostrosky-Zeichner L, Cornely OA *et al.* Isavuconazole treatment for mucormycosis: a single-arm open-label trial and case-control analysis. *Lancet Infect Dis* 2016; **16**: 828–37.
- 32** Guarascio AJ, Slain D. Review of the new delayed-release oral tablet and intravenous dosage forms of posaconazole. *Pharmacotherapy* 2015; **35**: 208–19.
